# Supplementary material for: Correlation between pre-operative VE-cadherin and DLL4 and the maturation after primary arteriovenous fistula in uremic patients
Source: PeerJ. 2024 Nov 20;12:e18356. doi: 10.7717/peerj.18356 (PMC11585290; doi:10.7717/peerj.18356)
Supplement: Supplemental Information 1 [file peerj-12-18356-s001.xlsx]

## Sheet: data
Groups	Gender	Diabetes mellitus	Age	BMI	Systolic pressure(mmHg)	Diastolic pressure(mmHg)	VE-cadherin(ng/L)	DLL4(pg/mL)	Radial artery diameter(㎝)	Cephalic vein diameter(㎝)	Hemoglobin(g/L)	PTH(pg/mL)	Creatinine(umol/mL)	BUN(mmol/L)	Calcium(mmol/L)	Phosphorus(mmol/L)	Cephalic vein diameter at first puncture(㎝)	Blood flow at the brachial artery befor the first puncture(mL/min)	Fistula maturation duration (days)
0	2	2	66	26.6667	148	90	103.11	64.6278	0.26	0.35	9	133	658	22.87	1.67	1.57	0.58	885	55
0	1	2	70	24.2215	162	86	103.88	48.3174	0.22	0.23	93	306.8	730	27.3	2.19	1.98	0.55	930	55
0	1	1	70	24.4646	136	70	124.688	71.9938	0.29	0.33	99	344.6	465	11.17	2.04	0.96	0.45	1138	58
0	1	2	55	19.0311	150	100	104.651	50.422	0.21	0.24	77	588.7	814	40.39	2.14	2.33	0.44	965	52
0	1	1	72	24.977	160	80	117.752	60.4187	0.25	0.25	107	410	734	27.04	2	1.92	0.62	1083	48
0	2	1	39	23.4375	150	90	262.639	201.951	0.21	0.24	112	147.1	876	32.74	2.05	1.09	0.55	755	58
0	2	2	61	23.4375	133	76	106.963	104.088	0.24	0.26	93	438.1	503	27.15	2.17	1.51	0.58	1936	46
0	1	2	58	23.8751	108	78	207.921	126.186	0.21	0.24	66	303.7	572	17.3	1.48	1.29	0.49	839	49
0	1	2	52	24.3375	117	61	125.459	56.2095	0.21	0.3	95	887	1743	71.88	2.09	1.26	0.537	1004	56
0	1	2	39	23.3887	158	97	167.075	114.611	0.25	0.25	74	249.8	1024	45.82	1.98	2.26	0.62	1056	50
0	1	2	68	24.9135	166	78	92.3202	92.5133	0.27	0.24	71	146.3	1469	24.83	1.66	2.27	0.66	1032	51
0	1	2	53	19.2837	140	93	83.8428	98.827	0.25	0.25	67	426	1176	43.75	1.95	2.4	0.53	1304	53
0	1	1	40	29.2969	170	100	221.023	172.487	0.25	0.25	101	66.7	542	26.77	2.27	1.63	0.64	1765	55
0	1	1	69	19.9481	158	81	106.192	90.4088	0.22	0.22	81	75.2	757	40.5	2.15	2.35	0.56	1340	50
0	1	2	65	24.2424	148	98	110.816	89.8826	0.25	0.25	64	349.7	1089	26.9	1.97	2.03	0.59	1287	48
0	1	2	79	25.7812	135	85	174.012	96.1963	0.22	0.22	87	228.8	538	15.66	2.14	1.74	0.5	801	55
0	1	1	85	24.1633	180	86	118.523	92.5133	0.22	0.23	91	254.6	699	23.07	1.93	2.1	0.46	994	51
0	1	1	53	25.2493	177	116	114.67	87.778	0.25	0.26	111	94.7	525	20.38	2.4	1.96	0.57	1065	48
0	1	1	58	24.5089	156	87	153.974	93.5656	0.25	0.28	83	350.6	840	34.22	1.9	2.26	0.65	1991	50
0	1	2	56	20.4529	154	81	153.203	126.186	0.26	0.27	51	234	486	27.94	2.18	1.61	0.6	1923	55
0	1	2	58	24.4418	145	90	200.985	123.03	0.22	0.23	101	262.7	604	23.33	2.21	1.4	0.56	887	58
0	1	2	75	24.977	130	66	169.388	97.2486	0.19	0.25	82	790.27	686	22.94	2.3	1.13	0.53	863	49
0	1	1	59	23.5102	156	89	128.542	93.0395	0.22	0.23	92	392.7	944	31.15	1.88	2.64	0.54	893	60
0	1	2	40	21.1073	154	72	127	88.3042	0.23	0.25	96	497.88	1073	35.66	2.13	2.47	0.56	985	58
0	2	2	29	22.8624	146	109	122.376	90.9349	0.19	0.22	82	140.5	593	25.39	2.23	1.9	0.6	1035	48
0	1	2	24	25.9455	167	112	128.542	100.405	0.22	0.23	116	219.5	533	25.4	2.07	1.6	0.62	1491	57
0	1	2	76	21.4533	154	91	278.052	219.84	0.26	0.22	98	386	527	34.47	2.28	1.56	0.5	856	51
0	1	2	35	18.937	156	82	157.057	96.7225	0.21	0.21	114	216	673	22.85	2.13	1.69	0.48	1028	49
0	1	1	58	24.8016	169	72	120.064	89.3565	0.22	0.25	70	240.2	706	25.36	2.01	1.96	0.4475	793	55
0	1	1	37	27.4691	160	100	79.2188	63.0494	0.23	0.28	118	110	611	15.52	2.16	1.62	0.5012	923	45
1	1	1	52	22.921	160	95	126.23	90.4088	0.27	0.22	75	126.1	471	12.71	2	1.4	0.42	501	65
1	2	2	66	22.8928	106	72	187.113	164.069	0.17	0.18	72	257.2	599	34.28	2.08	2.62	0.38	483	68
1	1	1	51	20.202	148	78	74.5947	57.7879	0.24	0.23	90	119	282	12.73	1.97	1.19	0.4	550	58
1	2	2	46	21.3333	146	80	80.7601	63.0494	0.25	0.25	92	87.4	360	12.6	2.08	1.77	0.45	468	67
1	2	2	42	37.1094	152	95	97.7149	53.0527	0.17	0.26	91	426.1	472	10.23	1.85	1.32	0.47	489	61
1	1	2	21	26.2346	140	87	79.9894	40.4253	0.21	0.24	97	220.3	1444	34.07	1.95	2.67	0.39	442	65
1	1	2	20	19.8347	140	90	93.0909	45.1605	0.2	0.21	125	1048	1272	17.54	2.2	2.72	0.3759	570	58
1	2	2	33	19.487	135	78	66.1173	18.3273	0.23	0.21	83	911.8	768	30.26	1.8	1.79	0.44	545	59
1	1	2	35	22.3081	151	99	76.1361	71.9938	0.28	0.24	96	99.5	863	23.66	2.08	1.47	0.46	526	60
1	1	2	58	22.231	137	75	98.4856	54.1049	0.19	0.23	78	281.1	1233	45.01	2.05	1.67	0.43	610	64
1	2	1	65	20.4444	140	80	106.963	76.7291	0.18	0.19	59	440.2	981	35.62	1.6	2.47	0.3401	554	66
1	1	2	37	24.8163	168	10	83.8428	34.1115	0.22	0.23	94	376.8	716	16.71	2.05	1.38	0.48	620	64
1	1	1	25	20.0692	145	70	107.734	94.0917	0.25	0.23	110	268.6	453	21.24	2.11	1.14	0.4	568	62
1	1	2	46	16.609	130	70	103.88	75.1506	0.25	0.2	107	175.3	412	20.76	2.12	1.98	0.43	534	68
Groups：0=Mature group 1=Failure group；Gender：1=male 2=Female； Diabetes mellitus：1=Present ，2=Absent
